# Supplementary material
Source: PubMed Central journal article supplement (PMC10078153)
Supplement: NMO-35-0-s001.pdf [file NMO-35-0-s001.pdf]

**Supplement Table 1. Clinical EGG Diagnoses Based on Percentage Distribution of Gastric Myoelectrical Activity (GMA) at baseline and after the Water Load Satiation Test (WLST) in Healthy Subjects**

| <b>Clinical EGG Diagnoses</b>                          | <b>Percentage Distribution of GMA* in Response to the WLST</b>                                                                              |
|--------------------------------------------------------|---------------------------------------------------------------------------------------------------------------------------------------------|
| Normal 3 cpm GMA<br>(2.4-3.75 cpm)                     | >18% at baseline<br>AND<br>>10%, 23%, and 36% at 10, 20, and 30 minutes after WLST at 2 or more time periods                                |
| Hyper-Normal 3 cpm GMA<br>(2.5-3.75 cpm)               | >54% at baseline<br>AND<br>>36%, 57%, and 68% at 10, 20, and 30 minutes after WLST at 2 or more time periods                                |
| Hypo-Normal 3 cpm GMA<br>(2.5-3.75 cpm)                | <18% at baseline<br>AND<br><10%, 23%, and 36% at 10, 20, and 30 minutes after WLST at 2 or more time periods                                |
| Bradygastria<br>(1.0-2.5 cpm)                          | >61% at baseline<br>AND<br>>77%, 65%, and 45% at 10, 20, and 30 minutes after WLST at 2 or more time periods                                |
| Tachygastria<br>(3.75-10 cpm)                          | >25% at baseline<br>AND<br>>18%, 17%, and 17% at 10, 20, and 30 minutes after WLST at 2 or more time periods                                |
| Mixed Dysrhythmia:<br>Bradygastria AND<br>Tachygastria | normal ranges listed above at baseline<br>AND<br>at increased % listed above at 10, 20, and 30 minutes after WLST at 2 or more time periods |
| Duodenal-Respiration<br>(10-15 cpm)                    | >10% at baseline<br>AND<br>>6%, 5%, and 9% at 10, 20, and 30 minutes after WLST at 2 or more time points                                    |

\*the % GMA is expressed as the percentage distribution of power in each of the frequency ranges for the baseline and 0-10, 11-20 and 21-30 minute periods after the WLST

**Supplement Table 2. Characteristics at enrollment between enrolled patients with completed vs. missing gastric myoelectrical activity (GMA)**

| <b>Characteristic at enrollment</b> | <b>Category</b>      | <b>Completed GMA (n=397)</b> | <b>Missing GMA (n=109*)</b> | <b>P-value</b> |
|-------------------------------------|----------------------|------------------------------|-----------------------------|----------------|
| Clinic                              | A                    | 24                           | 4                           | <0.0001        |
|                                     | B                    | 32                           | 6                           |                |
|                                     | C                    | 6                            | 0                           |                |
|                                     | D                    | 25                           | 0                           |                |
|                                     | E                    | 66                           | 48                          |                |
|                                     | F                    | 68                           | 40                          |                |
|                                     | G                    | 54                           | 3                           |                |
|                                     | H                    | 24                           | 6                           |                |
|                                     | I                    | 98                           | 2                           |                |
| Age - yrs                           | Mean (SD)            | 44 (14)                      | 45 (14)                     | 0.85           |
| Sex                                 | Male                 | 57 (14%)                     | 13 (8%)                     | 0.51           |
|                                     | Female               | 340 (86%)                    | 96 (92%)                    |                |
| Race                                | Non-white            | 35 (9%)                      | 9 (8%)                      | 0.85           |
|                                     | White                | 362 (91%)                    | 100 (92%)                   |                |
| Gastric emptying status             | Gastroparesis        | 284 (72%)                    | 82 (77%)                    | 0.29           |
|                                     | Functional dyspepsia | 113 (28%)                    | 25 (23%)                    |                |

\*Two patients with missing gastric emptying status

**Supplement Table 3. Characteristics at enrollment in patients with clinician-assessed normal vs dysrhythmia GMAs by Gastroparesis and Functional Dyspepsia status**

| Characteristics at Enrollment           | Gastroparesis           |                   |         | Functional Dyspepsia   |                   |         |
|-----------------------------------------|-------------------------|-------------------|---------|------------------------|-------------------|---------|
|                                         | Dysrhythmia GMA (n=188) | Normal GMA (n=96) | P-value | Dysrhythmia GMA (n=73) | Normal GMA (n=40) | P-value |
| <b>Demographics</b>                     |                         |                   |         |                        |                   |         |
| Gender (female)                         | 156 (83%)               | 82 (85%)          | 0.73    | 65 (89%)               | 37 (92%)          | 0.74    |
| Age – yr                                | 44 (13)                 | 45 (14)           | 0.51    | 45 (15)                | 43 (17)           | 0.61    |
| Race (white)                            | 169 (90%)               | 88 (92%)          | 0.68    | 68 (93%)               | 37 (92%)          | 1.00    |
| Ethnicity (Hispanic)                    | 35 (19%)                | 9 (9%)            | 0.06    | 11 (15%)               | 3 (8%)            | 0.37    |
| Body mass index (kg/m <sup>2</sup> )    | 29 (7)                  | 26 (7)            | 0.0004  | 29 (10)                | 26 (9)            | 0.05    |
| <b>Characteristics of gastroparesis</b> |                         |                   |         |                        |                   |         |
| Etiology                                |                         |                   | 0.32    |                        |                   | 0.92    |
| Diabetes                                | 57 (30%)                | 37 (39%)          |         | 19 (26%)               | 9 (22%)           |         |
| Idiopathic                              | 123 (65%)               | 54 (56%)          |         | 53 (73%)               | 30 (75%)          |         |
| Fundoplication                          | 8 (4%)                  | 5 (5%)            |         | 1 (1%)                 | 1 (2%)            |         |
| Acute onset of symptoms                 | 73 (39%)                | 41 (43%)          | 0.61    | 19 (26%)               | 19 (48%)          | 0.02    |
| Severity                                |                         |                   | 0.23    |                        |                   | 0.14    |
| Grade 1, mild                           | 32 (17%)                | 24 (25%)          |         | 16 (22%)               | 8 (20%)           |         |
| Grade 2, compensated                    | 130 (70%)               | 58 (60%)          |         | 52 (71%)               | 24 (60%)          |         |
| Grade 3, gastric failure                | 24 (13%)                | 14 (15%)          |         | 5 (7%)                 | 8 (20%)           |         |
| Duration of symptoms – yr               | 5 (7)                   | 7 (7)             | 0.39    | 8 (9)                  | 5 (4)             | 0.01    |
| <b>Rome III categorization</b>          |                         |                   |         |                        |                   |         |
| PDS only                                | 36 (19%)                | 20 (21%)          | 0.59    | 15 (21%)               | 13 (32%)          | 0.56    |
| EPS only                                | 20 (11%)                | 7 (7%)            |         | 4 (5%)                 | 2 (5%)            |         |
| Both PDS and EPS                        | 94 (50%)                | 54 (56%)          |         | 42 (58%)               | 19 (48%)          |         |
| Neither PDS nor EPS                     | 38 (20%)                | 15 (16%)          |         | 12 (16%)               | 6 (15%)           |         |
| <b>Scintigraphy</b>                     |                         |                   |         |                        |                   |         |
| 2-hr solid retention - %                | 64 (18)                 | 66 (17)           | 0.28    | 32 (16)                | 29 (16)           | 0.37    |
| 4-hr solid retention - %                | 30 (21)                 | 32 (21)           | 0.55    | 4 (3)                  | 4 (3)             | 0.50    |
| <b>Medication use</b>                   |                         |                   |         |                        |                   |         |
| Systemic corticosteroids                | 48 (26%)                | 13 (14%)          | 0.02    | 18 (25%)               | 7 (18%)           | 0.48    |
| Narcotic pain medications               | 66 (35%)                | 31 (32%)          | 0.69    | 25 (34%)               | 10 (25%)          | 0.40    |
| Neuropathic pain medications            | 60 (32%)                | 31 (32%)          | 1.00    | 28 (38%)               | 6 (15%)           | 0.01    |
| Antidepressants                         | 150 (80%)               | 79 (82%)          | 0.75    | 57 (78%)               | 33 (82%)          | 0.63    |
| Mirtazapine (Remeron)                   | 12 (6%)                 | 2 (2%)            | 0.15    | 6 (8%)                 | 3 (8%)            | 1.00    |
| <b>Co-Morbidities</b>                   |                         |                   |         |                        |                   |         |
| GERD                                    | 125 (66%)               | 62 (65%)          | 0.79    | 49 (67%)               | 25 (62%)          | 0.68    |

| Characteristics at Enrollment                 | Gastroparesis                 |                         |         | Functional Dyspepsia         |                         |         |
|-----------------------------------------------|-------------------------------|-------------------------|---------|------------------------------|-------------------------|---------|
|                                               | Dysrhythmia<br>GMA<br>(n=188) | Normal<br>GMA<br>(n=96) | P-value | Dysrhythmia<br>GMA<br>(n=73) | Normal<br>GMA<br>(n=40) | P-value |
| Interstitial cystitis                         | 6 (3%)                        | 2 (2%)                  | 0.72    | 1 (1%)                       | 2 (5%)                  | 0.29    |
| Endometriosis                                 | 25 (13%)                      | 14 (15%)                | 0.86    | 15 (21%)                     | 6 (15%)                 | 0.61    |
| Migraine headaches                            | 75 (40%)                      | 34 (35%)                | 0.52    | 29 (40%)                     | 13 (32%)                | 0.54    |
| Chronic fatigue syndrome                      | 24 (13%)                      | 11 (11%)                | 0.85    | 6 (8%)                       | 2 (5%)                  | 0.71    |
| PCOS                                          | 17 (9%)                       | 10 (10%)                | 0.83    | 7 (10%)                      | 4 (10%)                 | 1.00    |
| Fibromyalgia                                  | 27 (14%)                      | 15 (16%)                | 0.86    | 19 (26%)                     | 9 (22%)                 | 0.82    |
| Eating disorder                               | 7 (4%)                        | 2 (2%)                  | 0.72    | 1 (1%)                       | 1 (2%)                  | 1.00    |
| Anxiety requiring treatment                   | 57 (30%)                      | 18 (19%)                | 0.05    | 18 (25%)                     | 6 (15%)                 | 0.34    |
| Major depression requiring treatment          | 62 (33%)                      | 26 (27%)                | 0.34    | 22 (30%)                     | 7 (18%)                 | 0.18    |
| Bipolar                                       | 11 (6%)                       | 5 (5%)                  | 1.00    | 10 (14%)                     | 4 (10%)                 | 0.77    |
|                                               |                               |                         |         |                              |                         |         |
| <b>PAGI-SYM</b>                               |                               |                         |         |                              |                         |         |
| GCSI total score                              | 2.9 (1.1)                     | 2.7 (1.1)               | 0.24    | 2.7 (1.0)                    | 2.8 (1.0)               | 0.73    |
| Nausea/vomiting subscale                      | 2.2 (1.5)                     | 1.9 (1.4)               | 0.11    | 1.9 (1.3)                    | 2.0 (1.2)               | 0.72    |
| Nausea                                        | 3.2 (1.6)                     | 3.1 (1.5)               | 0.75    | 3.0 (1.6)                    | 3.2 (1.5)               | 0.47    |
| Retching                                      | 1.8 (1.7)                     | 1.3 (1.6)               | 0.01    | 1.4 (1.7)                    | 1.5 (1.6)               | 0.91    |
| Vomiting                                      | 1.7 (1.9)                     | 1.4 (1.7)               | 0.22    | 1.2 (1.6)                    | 1.2 (1.6)               | 0.96    |
| Post-prandial fullness/early satiety subscale | 3.4 (1.2)                     | 3.3 (1.3)               | 0.59    | 3.3 (1.4)                    | 3.5 (1.2)               | 0.46    |
| Stomach fullness                              | 3.6 (1.2)                     | 3.4 (1.3)               | 0.18    | 3.5 (1.5)                    | 3.6 (1.3)               | 0.59    |
| Unable to finish meal                         | 3.4 (1.6)                     | 3.4 (1.5)               | 0.91    | 3.3 (1.6)                    | 3.6 (1.4)               | 0.29    |
| Felt full after meals                         | 3.7 (1.3)                     | 3.5 (1.6)               | 0.42    | 3.6 (1.5)                    | 3.8 (1.3)               | 0.49    |
| Loss of appetite                              | 2.8 (1.6)                     | 2.9 (1.6)               | 0.80    | 2.7 (1.6)                    | 2.8 (1.5)               | 0.78    |
| Bloating subscale                             | 3.1 (1.6)                     | 3.0 (1.7)               | 0.54    | 3.1 (1.7)                    | 3.0 (1.7)               | 0.85    |
| Bloating                                      | 3.3 (1.6)                     | 3.1 (1.7)               | 0.45    | 3.2 (1.7)                    | 3.2 (1.7)               | 0.98    |
| Stomach visibly larger                        | 3.0 (1.8)                     | 2.9 (1.8)               | 0.67    | 3.0 (1.9)                    | 2.8 (1.9)               | 0.72    |
| Upper abdominal pain subscale                 | 3.1 (1.5)                     | 2.8 (1.5)               | 0.08    | 2.8 (1.5)                    | 2.9 (1.6)               | 0.95    |
| Lower abdominal pain subscale                 | 1.9 (1.6)                     | 2.0 (1.5)               | 0.92    | 2.1 (1.4)                    | 1.9 (1.6)               | 0.56    |
| Heartburn/regurgitation subscale              | 1.9 (1.4)                     | 1.8 (1.3)               | 0.47    | 1.7 (1.4)                    | 1.6 (1.2)               | 0.79    |
| Constipation                                  | 2.4 (1.8)                     | 2.8 (1.7)               | 0.07    | 2.6 (1.7)                    | 2.8 (1.7)               | 0.64    |
| Diarrhea                                      | 1.8 (1.8)                     | 1.8 (1.7)               | 0.93    | 1.6 (1.6)                    | 1.2 (1.6)               | 0.16    |
|                                               |                               |                         |         |                              |                         |         |
| <b>Water load test</b>                        |                               |                         |         |                              |                         |         |
| Amount – mL                                   | 394 (239)                     | 346 (169)               | 0.05    | 405 (215)                    | 396 (247)               | 0.84    |
| Amount < 238 mL                               | 46 (25%)                      | 28 (29%)                | 0.48    | 14 (19%)                     | 7 (18%)                 | 1.00    |
| Amount < 300 mL                               | 72 (39%)                      | 39 (41%)                | 0.80    | 24 (33%)                     | 16 (40%)                | 0.54    |

\*GERD = Gastroesophageal Reflux Disease; PCOS = Polycystic Ovary Syndrome; PDS = Postprandial Distress Syndrome; EPS=Epigastric Pain Syndrome; GI = Gastrointestinal
