# Supplementary material
Source: PubMed Central journal article supplement (PMC10078153)

Appendix Figure 1

### A. Gastric Myoelectrical Activity (Subject 1228, Idiopathic Gastroparesis, WL=120cc)

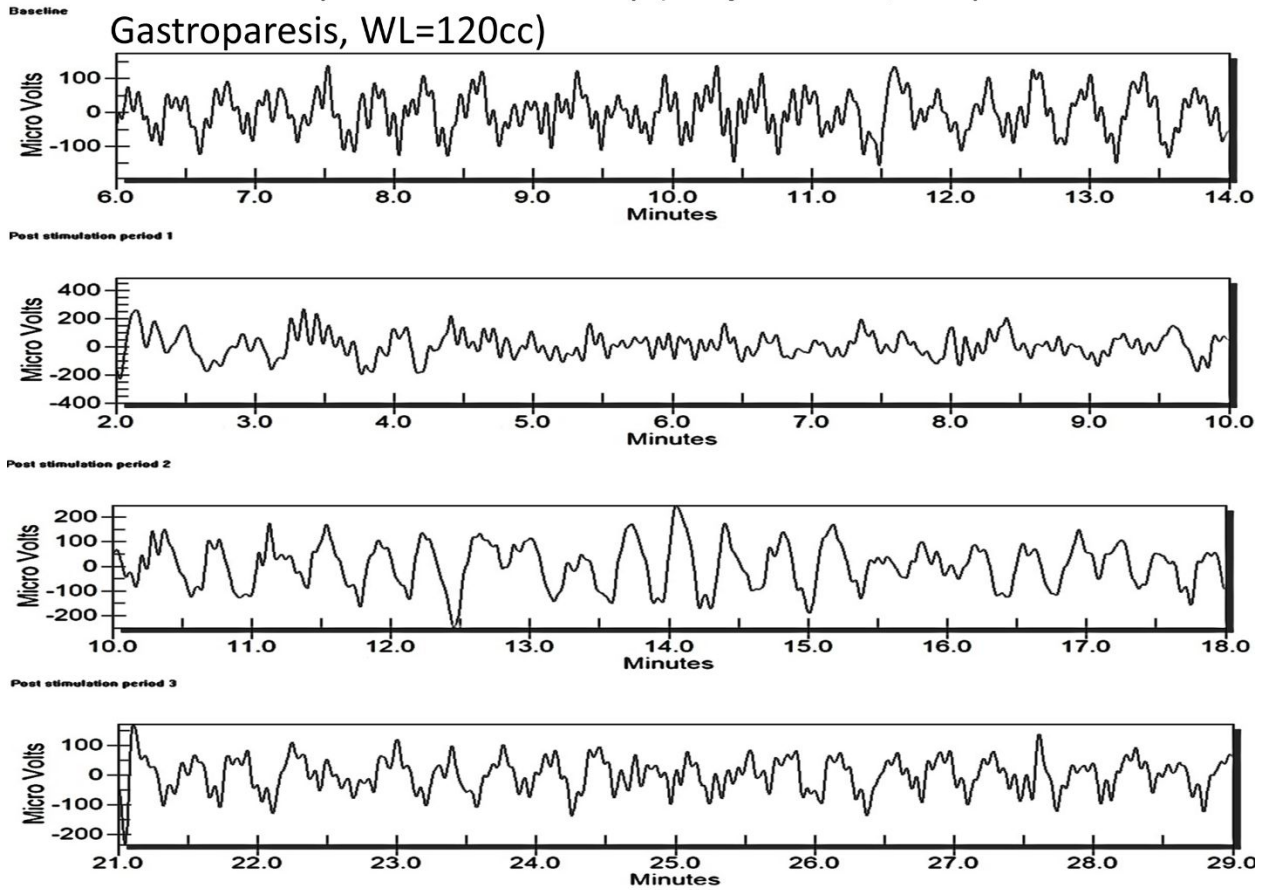

### B. Running Spectral Analysis

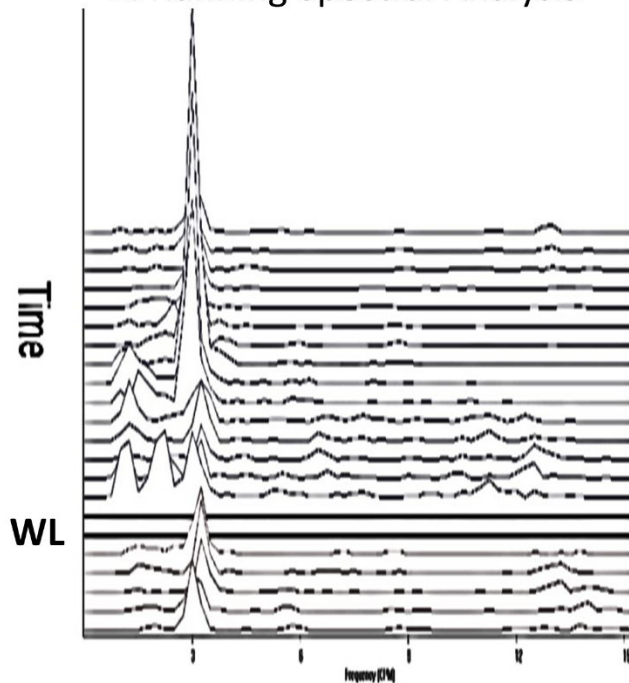

### C. Percentage Distribution

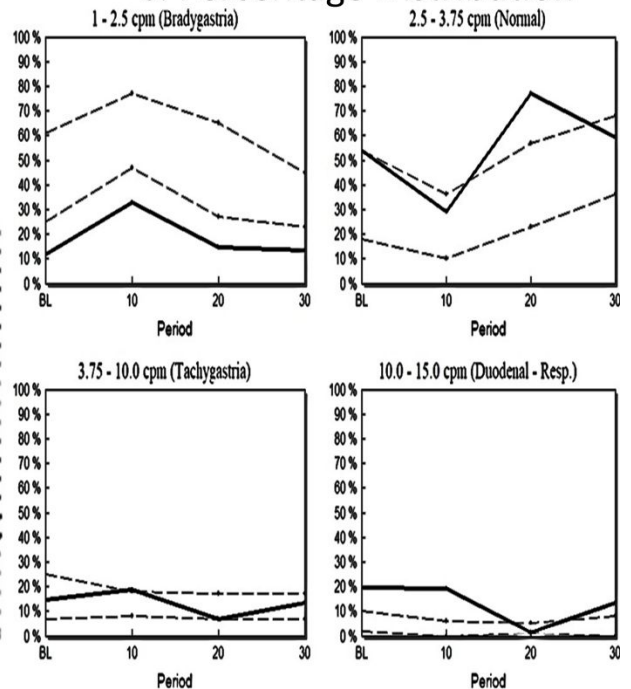

Appendix Figure 2.

### A. Gastric Myoelectrical Activity (Subject 4357, Functional Dyspepsia, WL=250cc)

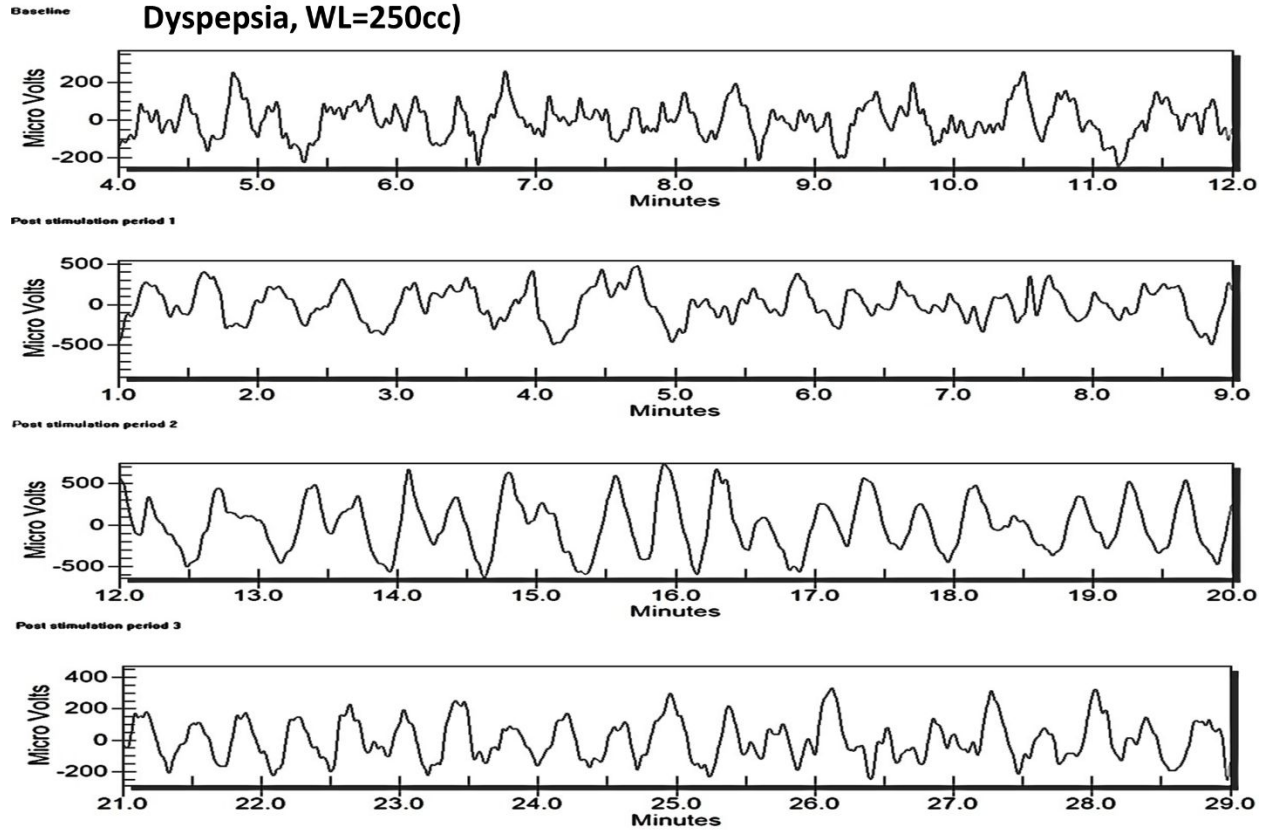

### B. Running Spectral Analysis

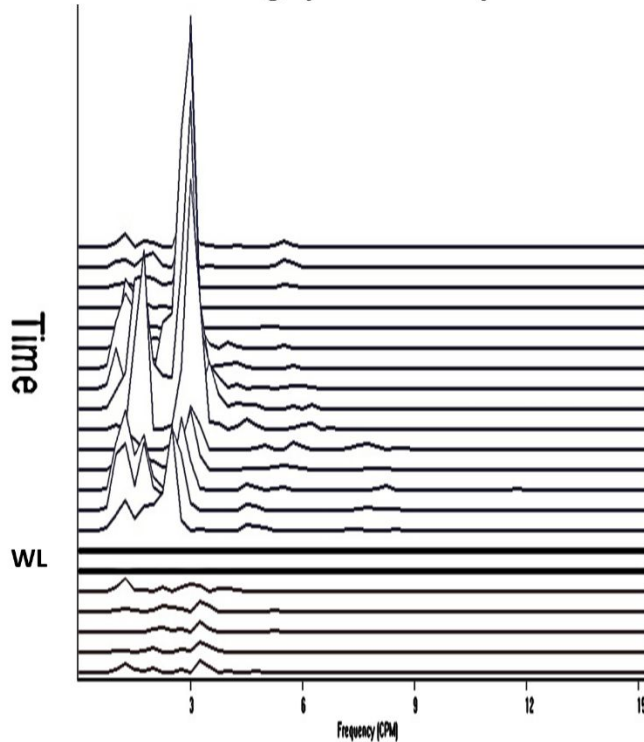

### C. Percentage Distribution

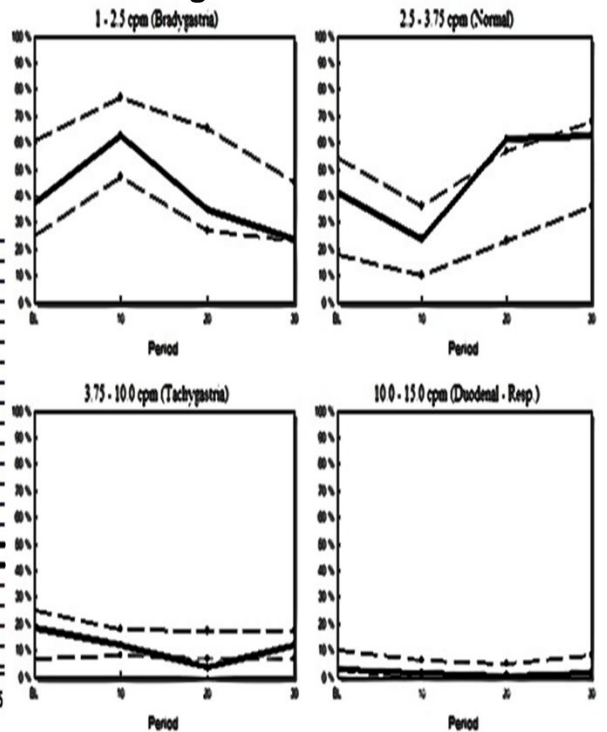

Appendix Figure 3

**A. Gastric Myoelectrical Activity (Subject 5227, Idiopathic Gastroparesis, WL = 240cc)**

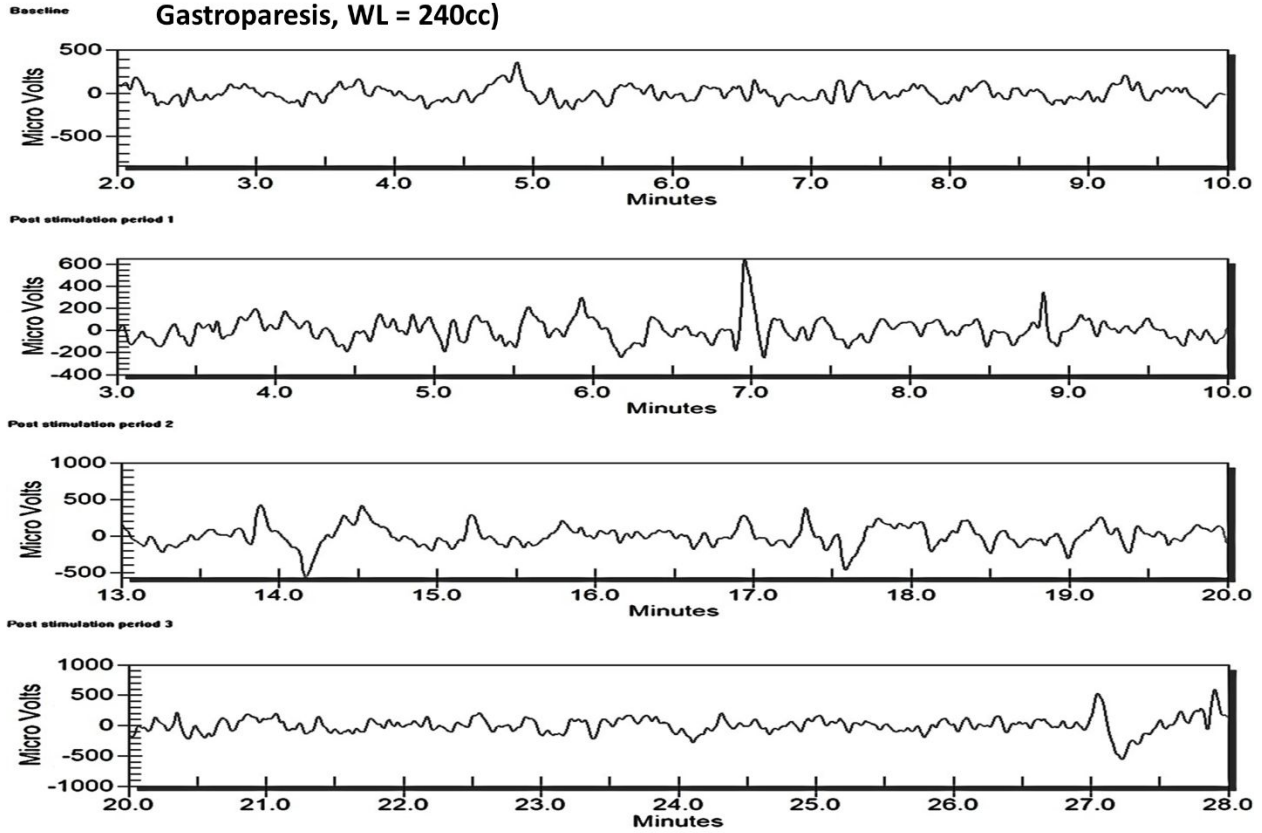

**B. Running Spectral Analysis**

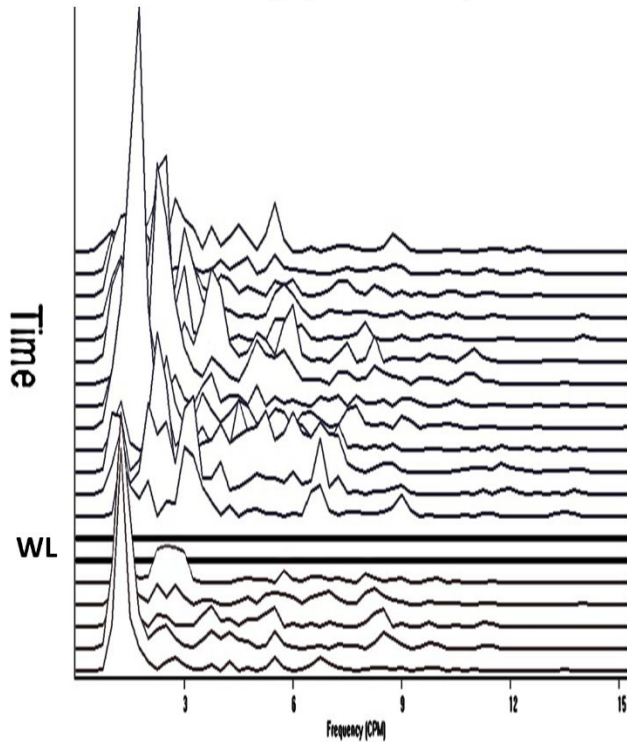

**C. Percentage Distribution**

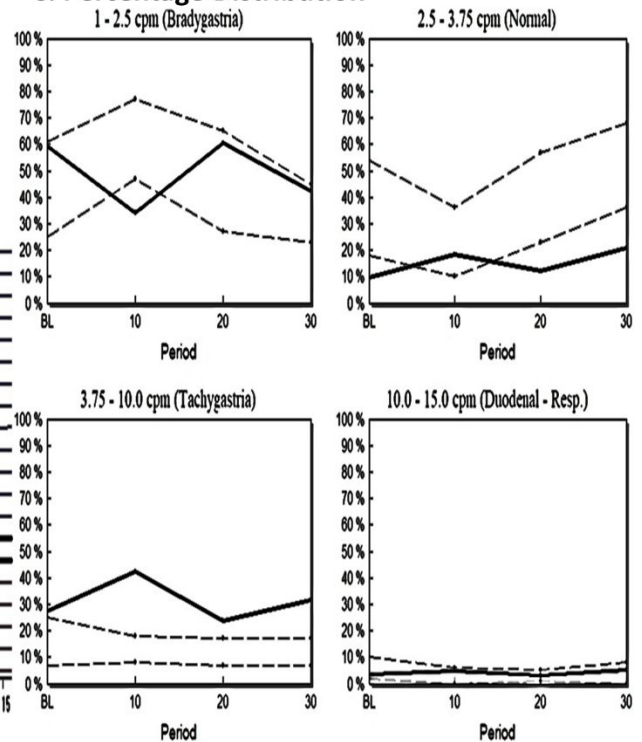

Appendix Figure 4.

**A. Gastric Myoelectrical Activity (Subject 7056, Functional Dyspepsia, WL= 240cc)**

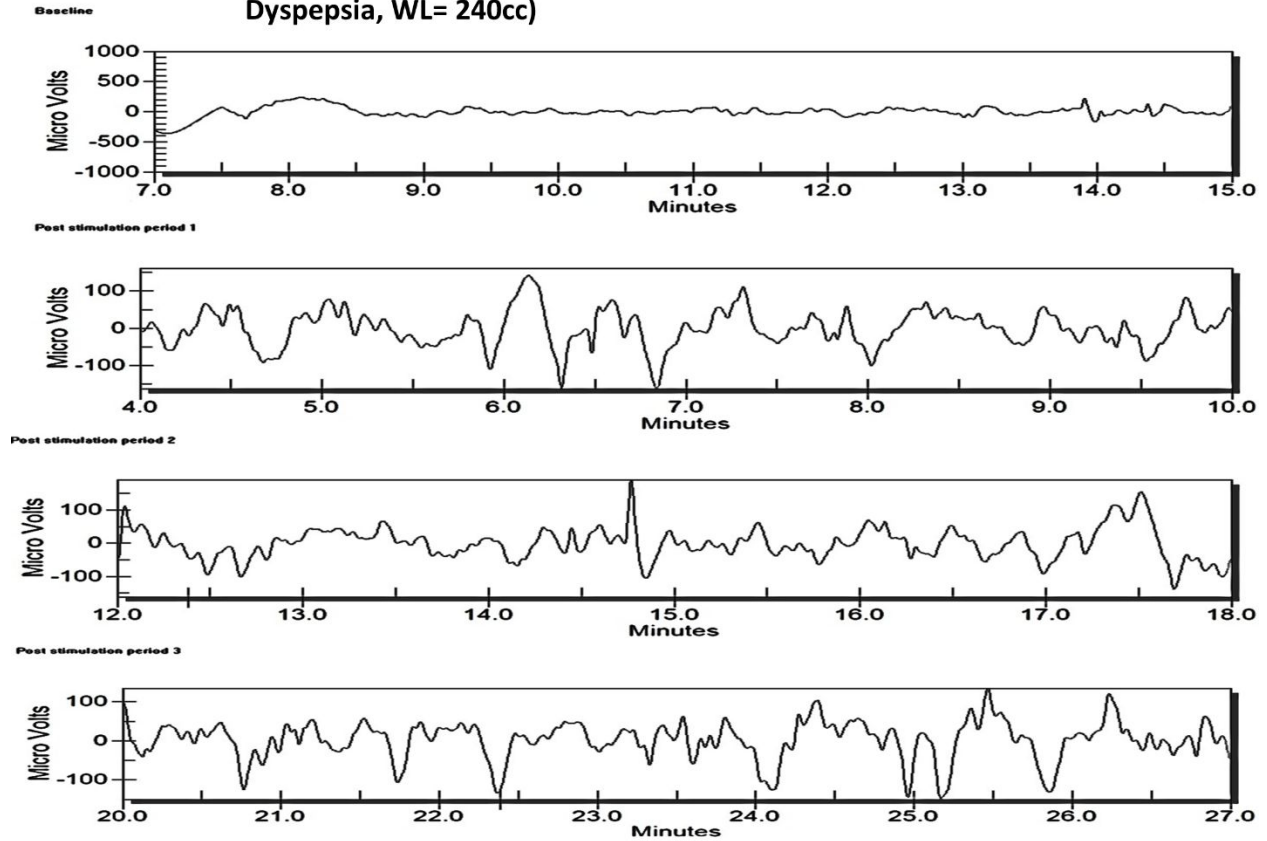

**B. Running Spectral Analysis**

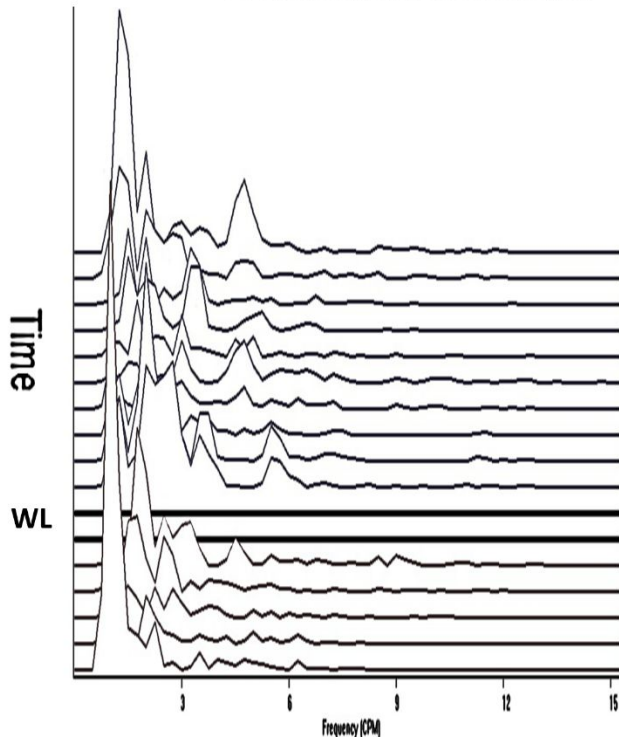

**C. Percentage Distribution**

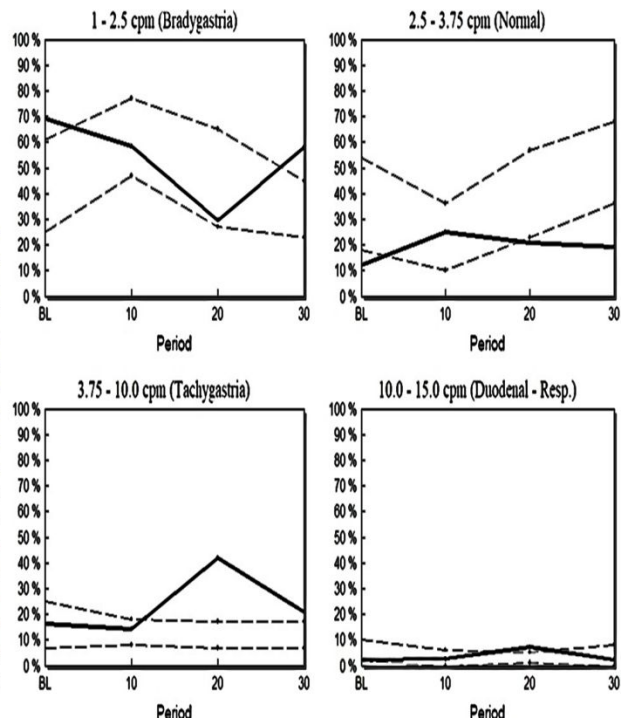

Supplement: NMO-35-0-s002.pdf [file NMO-35-0-s002.pdf]
